# Supplementary material
Source: PubMed Central journal article supplement (PMC3075326)

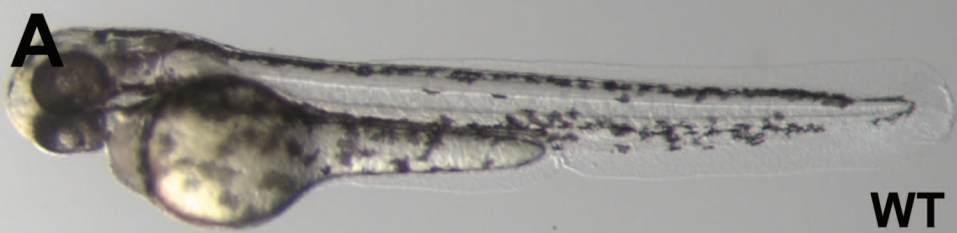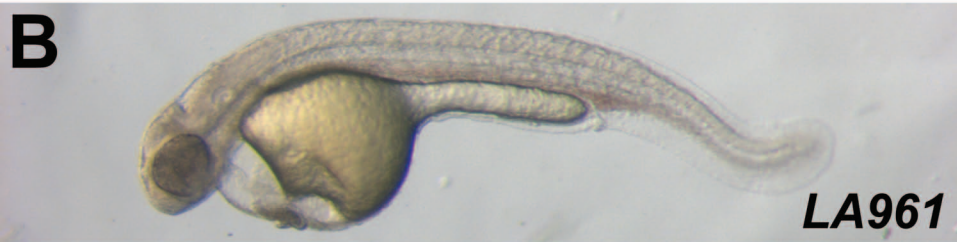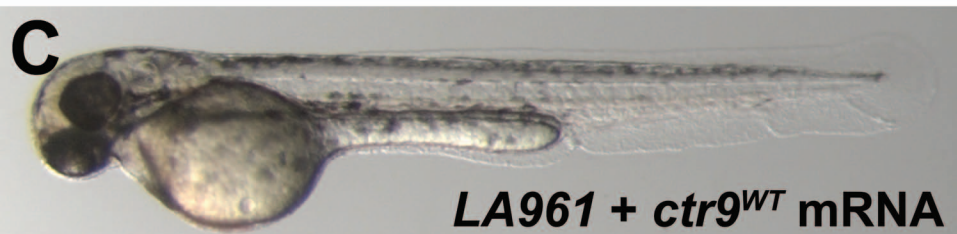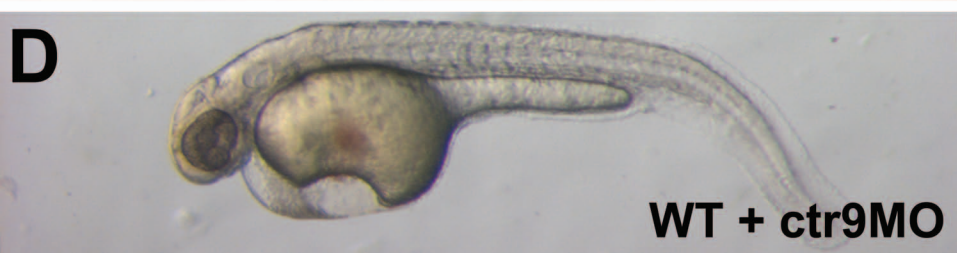

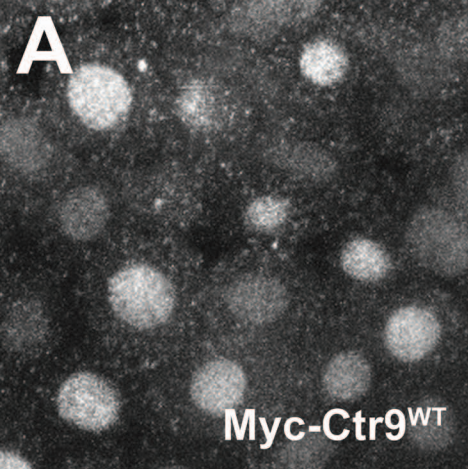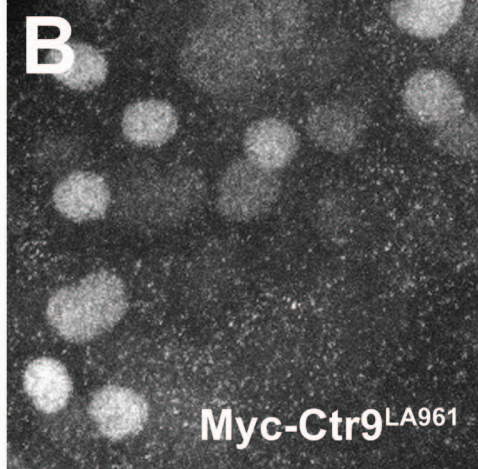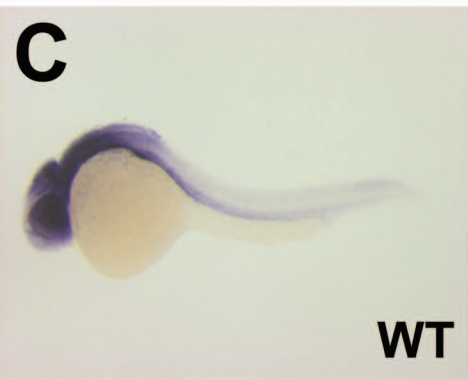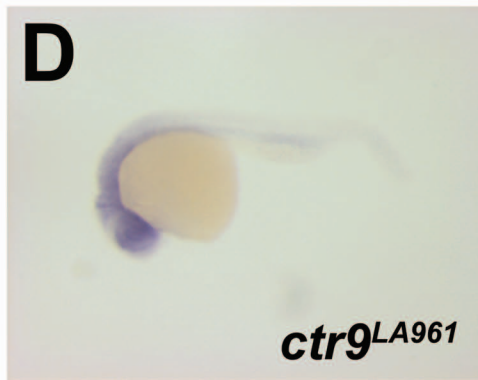

**A**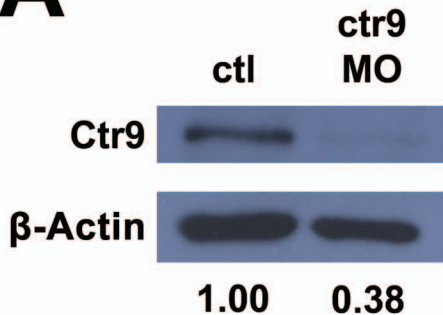**B**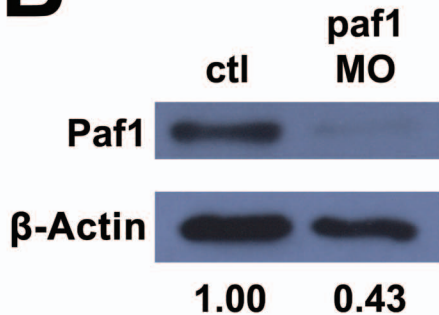**C**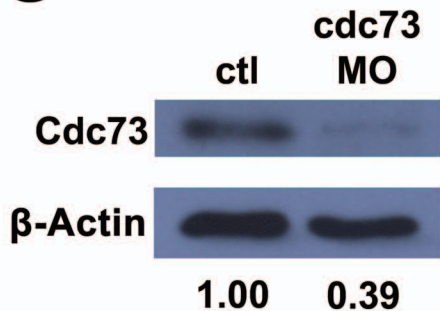**D**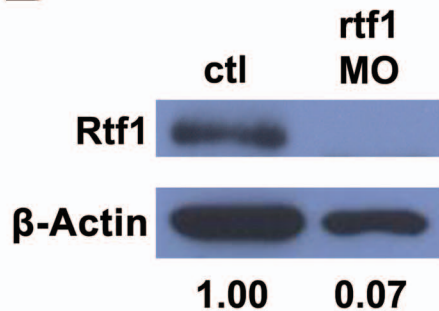

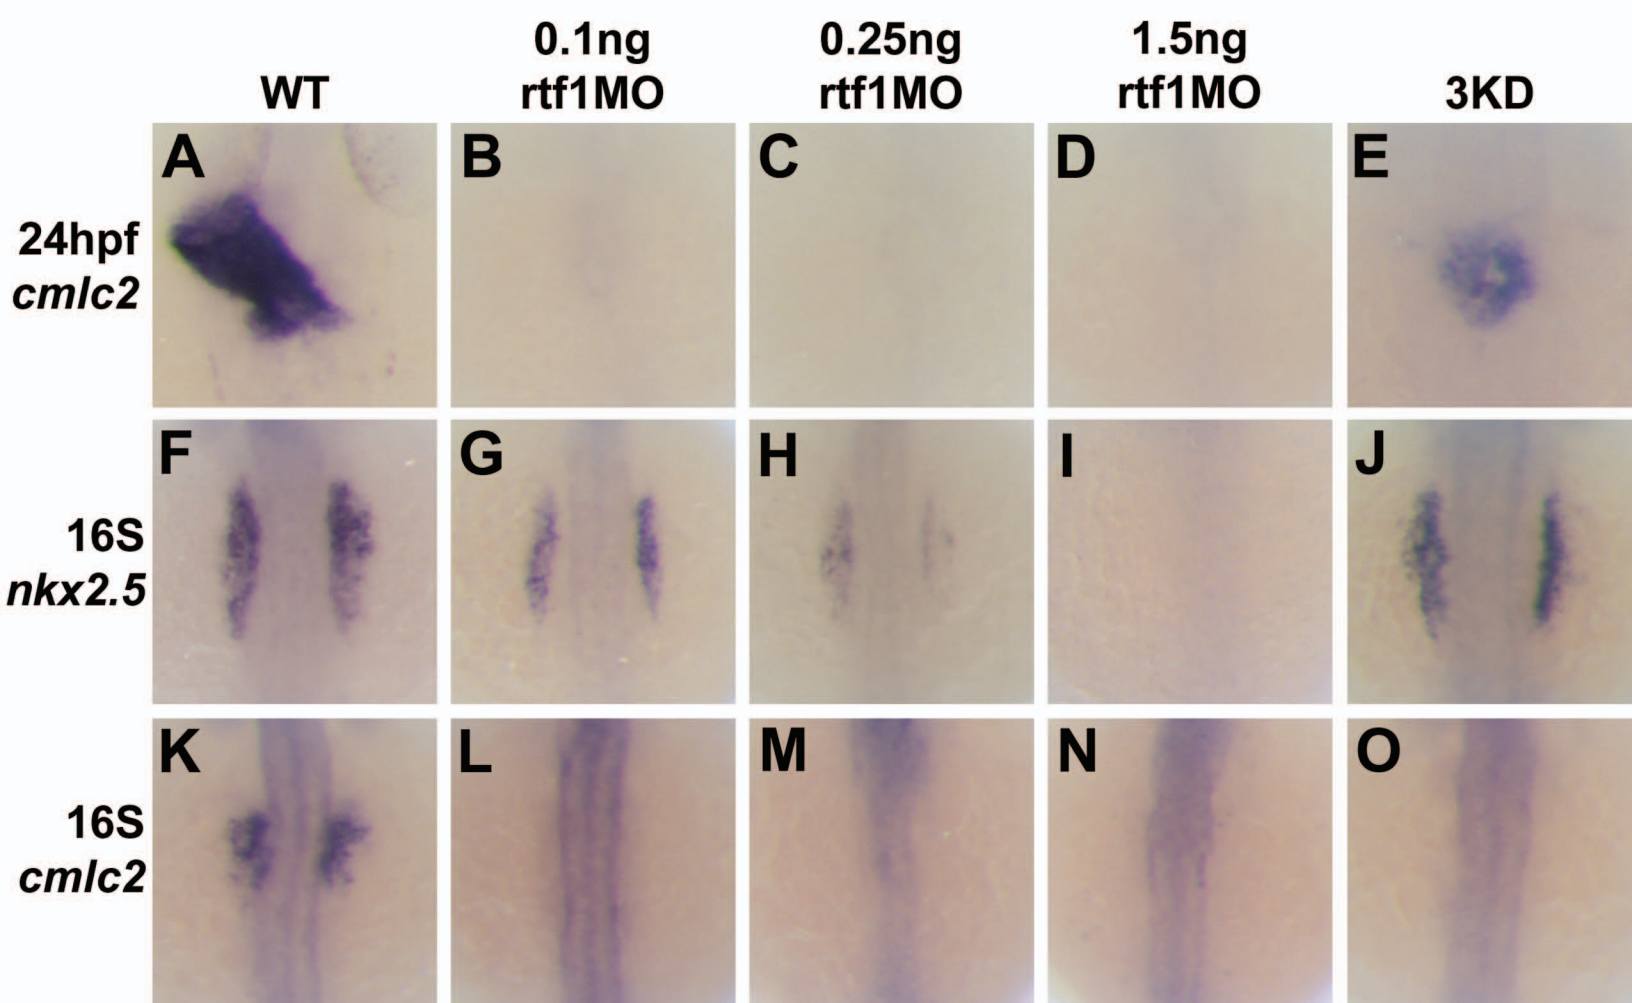

Supplement: NIHMS283318-supplement-02.pdf [file NIHMS283318-supplement-02.pdf]
